# Supplementary material
Source: HighWire-hosted journal article supplement (https://cmaj.ca/highwire/filestream/81128/field_highwire_adjunct_files/1/210779-res-2-at.pdf)
Supplement: 210779-res-2-at.pdf [file 210779-res-2-at.pdf]

## FNED2 Triage Manuscript – Supplementary File

### ICD-10 Codes Used in Diagnosis Specific Analysis

| Diagnosis                                      | ICD-10 Code | Description                                                              |
|------------------------------------------------|-------------|--------------------------------------------------------------------------|
| Anxiety disorder, unspecified                  | F419        | Anxiety disorder, unspecified                                            |
| Acute upper respiratory infection, unspecified | J069        | Acute upper respiratory infection, unspecified                           |
| Long Bone Fracture                             | S52590      | Unspecified fracture of lower end of radius, closed                      |
| Long Bone Fracture                             | S82600      | Fracture of lateral malleolus, closed                                    |
| Long Bone Fracture                             | S52600      | Fracture of lower end of both ulna and radius, closed                    |
| Long Bone Fracture                             | S82400      | Fracture of fibula alone, closed                                         |
| Long Bone Fracture                             | S42400      | Supracondylar fracture of humerus, closed                                |
| Long Bone Fracture                             | S52580      | Other fracture of lower end of radius, closed                            |
| Long Bone Fracture                             | S82300      | Fracture of lower (distal) end of tibia with or without fibula, closed   |
| Long Bone Fracture                             | S82100      | Fracture of upper (proximal) end of tibia with or without fibula, closed |
| Long Bone Fracture                             | S52800      | Fracture of other parts of forearm, closed                               |
| Long Bone Fracture                             | S52500      | Colles' fracture, closed                                                 |
| Long Bone Fracture                             | S82890      | Fracture of ankle NOS, closed                                            |
| Long Bone Fracture                             | S82800      | Bimalleolar fracture of ankle, closed                                    |
| Long Bone Fracture                             | S62800      | Fracture of other and unspecified parts of wrist and hand, closed        |
| Long Bone Fracture                             | S82500      | Fracture of medial malleolus, closed                                     |
| Long Bone Fracture                             | S52100      | Fracture of head of radius, closed                                       |
| Long Bone Fracture                             | S82200      | Fracture of shaft of tibia with or without fibula, closed                |
| Long Bone Fracture                             | S52200      | Fracture of shaft of ulna, closed                                        |
| Long Bone Fracture                             | S52090      | Unspecified fracture of upper end of ulna, closed                        |
| Long Bone Fracture                             | S82810      | Trimalleolar fracture of ankle, closed                                   |
| Long Bone Fracture                             | S52000      | Fracture of olecranon process of ulna, closed                            |
| Long Bone Fracture                             | S52400      | Fracture of shafts of both ulna and radius, closed                       |
| Long Bone Fracture                             | S42300      | Fracture of shaft of humerus, closed                                     |
| Long Bone Fracture                             | S42200      | Fracture of surgical neck of humerus, closed                             |
| Long Bone Fracture                             | S42290      | Fracture of unspecified part of upper end of humerus, closed             |
| Long Bone Fracture                             | S52300      | Fracture of shaft of radius, closed                                      |
| Long Bone Fracture                             | S72300      | Fracture of shaft of femur, closed                                       |
| Long Bone Fracture                             | S42480      | Fracture of other part of lower end of humerus, closed                   |
| Long Bone Fracture                             | S42220      | Fracture of greater tuberosity of humerus, closed                        |
| Long Bone Fracture                             | S42390      | Fracture of unspecified part of humerus, closed                          |
| Long Bone Fracture                             | S52700      | Multiple fractures of forearm, closed                                    |
| Long Bone Fracture                             | S52080      | Other/multiple fractures of upper end of ulna, closed                    |
| Long Bone Fracture                             | S42410      | Fracture of lateral condyle of humerus, closed                           |
| Long Bone Fracture                             | S72490      | Unspecified fracture of lower (distal) end of femur, closed              |
| Long Bone Fracture                             | S42280      | Fracture of other part of upper end of humerus, closed                   |

## FNED2 Triage Manuscript – Supplementary File

|                    |        |                                                                                   |
|--------------------|--------|-----------------------------------------------------------------------------------|
| Long Bone Fracture | S72900 | Fracture of femur, part unspecified, closed                                       |
| Long Bone Fracture | S52110 | Fracture of neck of radius, closed                                                |
| Long Bone Fracture | S42420 | Fracture of medial condyle of humerus, closed                                     |
| Long Bone Fracture | S82201 | Fracture of shaft of tibia with or without fibula, open                           |
| Long Bone Fracture | S72410 | Condylar fracture of femur, closed                                                |
| Long Bone Fracture | S52601 | Fracture of lower end of both ulna and radius, open                               |
| Long Bone Fracture | S42210 | Fracture of anatomical neck of humerus, closed                                    |
| Long Bone Fracture | S82301 | Fracture of lower (distal) end of tibia with or without fibula, open              |
| Long Bone Fracture | S52010 | Fracture of coronoid process of ulna, closed                                      |
| Long Bone Fracture | S52900 | Fracture of forearm, part unspecified, closed                                     |
| Long Bone Fracture | S52190 | Unspecified fracture of upper end of radius, closed                               |
| Long Bone Fracture | S52020 | Monteggia's fracture, closed                                                      |
| Long Bone Fracture | T0250  | Fractures involving multiple regions of both lower limbs, closed                  |
| Long Bone Fracture | T0240  | Fractures involving multiple regions of both upper limbs, closed                  |
| Long Bone Fracture | S82820 | Tibial plafond fracture of ankle with or without fibular/talar involvement closed |
| Long Bone Fracture | S72800 | Fractures of other parts of femur, closed                                         |
| Long Bone Fracture | S52201 | Fracture of shaft of ulna, open                                                   |
| Long Bone Fracture | S42490 | Fracture of unspecified part of lower end of humerus, closed                      |
| Long Bone Fracture | S52120 | Fracture of radius with ulna, upper end, closed                                   |
| Long Bone Fracture | S52401 | Fracture of shafts of both ulna and radius, open                                  |
| Long Bone Fracture | S72301 | Fracture of shaft of femur, open                                                  |
| Long Bone Fracture | S82700 | Multiple fractures of lower leg, closed                                           |
| Long Bone Fracture | T100   | Fracture of upper limb, level unspecified, closed                                 |
| Long Bone Fracture | S42700 | Multiple fractures of clavicle, scapula and humerus, closed                       |
| Long Bone Fracture | S52001 | Fracture of olecranon process of ulna, open                                       |
| Long Bone Fracture | S82101 | Fracture of upper (proximal) end of tibia with or without fibula, open            |
| Long Bone Fracture | S42401 | Supracondylar fracture of humerus, open                                           |
| Long Bone Fracture | S82891 | Fracture of ankle NOS, open                                                       |
| Long Bone Fracture | T1420  | Fracture of unspecified body region, closed                                       |
| Long Bone Fracture | S42800 | Fracture of other parts of shoulder and upper arm, closed                         |
| Long Bone Fracture | S52091 | Unspecified fracture of upper end of ulna, open                                   |
| Long Bone Fracture | S42301 | Fracture of shaft of humerus, open                                                |
| Long Bone Fracture | S72491 | Unspecified fracture of lower (distal) end of femur, open                         |
| Long Bone Fracture | S72420 | Supracondylar fracture of femur, closed                                           |
| Long Bone Fracture | S52701 | Multiple fractures of forearm, open                                               |
| Long Bone Fracture | S82501 | Fracture of medial malleolus, open                                                |
| Long Bone Fracture | S42481 | Fracture of other part of lower end of humerus, open                              |
| Long Bone Fracture | S42430 | Fracture of unspecified condyle of humerus, closed                                |
| Long Bone Fracture | S52180 | Other/multiple fracture of upper end of radius, closed                            |
| Long Bone Fracture | S52591 | Unspecified fracture of lower end of radius, open                                 |
| Long Bone Fracture | S52801 | Fracture of other parts of forearm, open                                          |

## FNED2 Triage Manuscript – Supplementary File

|                    |        |                                                                                  |
|--------------------|--------|----------------------------------------------------------------------------------|
| Long Bone Fracture | S82401 | Fracture of fibula alone, open                                                   |
| Long Bone Fracture | S52501 | Colles' fracture, open                                                           |
| Long Bone Fracture | S82801 | Bimalleolar fracture of ankle, open                                              |
| Long Bone Fracture | S82900 | Fracture of lower leg, part unspecified, closed                                  |
| Long Bone Fracture | S52101 | Fracture of head of radius, open                                                 |
| Long Bone Fracture | S82821 | Tibial plafond fracture of ankle with or without fibular/tarsal involvement open |
| Long Bone Fracture | S52121 | Fracture of radius with ulna, upper end, open                                    |
| Long Bone Fracture | S82811 | Trimalleolar fracture of ankle, open                                             |
| Long Bone Fracture | S52581 | Other fracture of lower end of radius, open                                      |
| Long Bone Fracture | S62801 | Fracture of other and unspecified parts of wrist and hand, open                  |
| Long Bone Fracture | T0290  | Multiple fractures, unspecified, closed                                          |
| Long Bone Fracture | S52021 | Monteggia's fracture, open                                                       |
| Long Bone Fracture | S52301 | Fracture of shaft of radius, open                                                |
| Long Bone Fracture | S72400 | Fracture of lower femoral epiphysis (separation), closed                         |
| Long Bone Fracture | T0251  | Fractures involving multiple regions of both lower limbs, open                   |
| Long Bone Fracture | S42391 | Fracture of unspecified part of humerus, open                                    |
| Long Bone Fracture | T120   | Fracture of lower limb, level unspecified, closed                                |
| Long Bone Fracture | S72700 | Multiple fractures of femur, closed                                              |
| Long Bone Fracture | S82601 | Fracture of lateral malleolus, open                                              |
| Long Bone Fracture | S52081 | Other/multiple fractures of upper end of ulna, open                              |
| Long Bone Fracture | S42291 | Fracture of unspecified part of upper end of humerus, open                       |
| Long Bone Fracture | S52191 | Unspecified fracture of upper end of radius, open                                |
| Long Bone Fracture | S82701 | Multiple fractures of lower leg, open                                            |
| Long Bone Fracture | S42211 | Fracture of anatomical neck of humerus, open                                     |
| Long Bone Fracture | S72801 | Fractures of other parts of femur, open                                          |
| Long Bone Fracture | S72701 | Multiple fractures of femur, open                                                |
| Long Bone Fracture | S42411 | Fracture of lateral condyle of humerus, open                                     |
| Long Bone Fracture | S72901 | Fracture of femur, part unspecified, open                                        |
| Long Bone Fracture | S52111 | Fracture of neck of radius, open                                                 |
| Long Bone Fracture | S52011 | Fracture of coronoid process of ulna, open                                       |
| Long Bone Fracture | S52901 | Fracture of forearm, part unspecified, open                                      |
| Long Bone Fracture | S42281 | Fracture of other part of upper end of humerus, open                             |
| Long Bone Fracture | S42221 | Fracture of greater tuberosity of humerus, open                                  |
| Long Bone Fracture | T121   | Fracture of lower limb, level unspecified, open                                  |
| Long Bone Fracture | S42201 | Fracture of surgical neck of humerus, open                                       |
| Long Bone Fracture | T0220  | Fractures involving multiple regions of one upper limb, closed                   |
| Long Bone Fracture | T0230  | Fractures involving multiple regions of one lower limb, closed                   |
| Long Bone Fracture | S82901 | Fracture of lower leg, part unspecified, open                                    |
| Long Bone Fracture | S42421 | Fracture of medial condyle of humerus, open                                      |
| Long Bone Fracture | S72411 | Condylar fracture of femur, open                                                 |
| Long Bone Fracture | S42431 | Fracture of unspecified condyle of humerus, open                                 |

## FNED2 Triage Manuscript – Supplementary File

|                      |        |                                                                                                  |
|----------------------|--------|--------------------------------------------------------------------------------------------------|
| Long Bone Fracture   | T0241  | Fractures involving multiple regions of both upper limbs, open                                   |
| Long Bone Fracture   | S72421 | Supracondylar fracture of femur, open                                                            |
| Spontaneous Abortion | O000   | Abdominal pregnancy                                                                              |
| Spontaneous Abortion | O001   | Tubal pregnancy                                                                                  |
| Spontaneous Abortion | O002   | Ovarian pregnancy                                                                                |
| Spontaneous Abortion | O008   | Other ectopic pregnancy                                                                          |
| Spontaneous Abortion | O009   | Ectopic pregnancy, unspecified                                                                   |
| Spontaneous Abortion | O010   | Classical hydatidiform mole                                                                      |
| Spontaneous Abortion | O011   | Incomplete and partial hydatidiform mole                                                         |
| Spontaneous Abortion | O019   | Hydatidiform mole, unspecified                                                                   |
| Spontaneous Abortion | O020   | Blighted ovum and nonhydatidiform mole                                                           |
| Spontaneous Abortion | O021   | Missed abortion                                                                                  |
| Spontaneous Abortion | O028   | Other specified abnormal products of conception                                                  |
| Spontaneous Abortion | O029   | Abnormal product of conception, unspecified                                                      |
| Spontaneous Abortion | O030   | Spontaneous abortion, incomplete, complicated by genital tract and pelvic infection              |
| Spontaneous Abortion | O031   | Spontaneous abortion, incomplete, complicated by delayed or excessive haemorrhage                |
| Spontaneous Abortion | O032   | Spontaneous abortion, incomplete, complicated by embolism                                        |
| Spontaneous Abortion | O033   | Spontaneous abortion, incomplete, with other and unspecified complications                       |
| Spontaneous Abortion | O034   | Spontaneous abortion, incomplete, without complication                                           |
| Spontaneous Abortion | O035   | Spontaneous abortion, complete or unspecified, complicated by genital tract and pelvic infection |
| Spontaneous Abortion | O036   | Spontaneous abortion, complete or unspecified, complicated by delayed or excessive haemorrhage   |
| Spontaneous Abortion | O037   | Spontaneous abortion, complete or unspecified, complicated by embolism                           |
| Spontaneous Abortion | O038   | Spontaneous abortion, complete or unspecified, with other and unspecified complications          |
| Spontaneous Abortion | O039   | Spontaneous abortion, complete or unspecified, without complication                              |
| Spontaneous Abortion | O050   | Other abortion, incomplete, complicated by genital tract and pelvic infection                    |
| Spontaneous Abortion | O051   | Other abortion, incomplete, complicated by delayed or excessive haemorrhage                      |
| Spontaneous Abortion | O053   | Other abortion, incomplete, with other and unspecified complications                             |
| Spontaneous Abortion | O054   | Other abortion, incomplete, without complication                                                 |
| Spontaneous Abortion | O055   | Other abortion, complete or unspecified, complicated by genital tract and pelvic infection       |
| Spontaneous Abortion | O056   | Other abortion, complete or unspecified, complicated by delayed or excessive haemorrhage         |
| Spontaneous Abortion | O058   | Other abortion, complete or unspecified, with other and unspecified complications                |
| Spontaneous Abortion | O059   | Other abortion, complete or unspecified, without complication                                    |

## FNED2 Triage Manuscript – Supplementary File

|                      |        |                                                                                                          |
|----------------------|--------|----------------------------------------------------------------------------------------------------------|
| Spontaneous Abortion | O20003 | Threatened abortion, antepartum condition or complication                                                |
| Spontaneous Abortion | O46003 | Antepartum haemorrhage with afibrinogenaemia, antepartum condition or complication                       |
| Spontaneous Abortion | O46083 | Antepartum haemorrhage with other coagulation defects, antepartum condition or complication              |
| Spontaneous Abortion | O46093 | Antepartum haemorrhage with coagulation defect, unspecified, antepartum condition or complication        |
| Spontaneous Abortion | O46803 | Other antepartum haemorrhage, antepartum condition or complication                                       |
| Spontaneous Abortion | O46903 | Antepartum haemorrhage, unspecified, antepartum condition or complication                                |
| Spontaneous Abortion | O0800  | Genital tract and pelvic infection following ectopic pregnancy                                           |
| Spontaneous Abortion | O0801  | Genital tract and pelvic infection following hydatidiform mole and other abnormal products of conception |
| Spontaneous Abortion | O0802  | Genital tract and pelvic infection following spontaneous abortion                                        |
| Spontaneous Abortion | O0808  | Genital tract and pelvic infection following other abortion                                              |
| Spontaneous Abortion | O0810  | Delayed or excessive haemorrhage following ectopic pregnancy                                             |
| Spontaneous Abortion | O0811  | Delayed or excessive haemorrhage following hydatidiform mole and other abnormal products of conception   |
| Spontaneous Abortion | O0812  | Delayed or excessive haemorrhage following spontaneous abortion                                          |
| Spontaneous Abortion | O0818  | Delayed or excessive haemorrhage following other abortion                                                |
| Spontaneous Abortion | O0822  | Embolism following spontaneous abortion                                                                  |
| Spontaneous Abortion | O0830  | Shock following ectopic pregnancy                                                                        |
| Spontaneous Abortion | O0832  | Shock following spontaneous abortion                                                                     |
| Spontaneous Abortion | O0872  | Other venous complications following spontaneous abortion                                                |
| Spontaneous Abortion | O0880  | Other complications following ectopic pregnancy                                                          |
| Spontaneous Abortion | O0881  | Other complications following hydatidiform mole and other abnormal products of conception                |
| Spontaneous Abortion | O0882  | Other complications following spontaneous abortion                                                       |
| Spontaneous Abortion | O0888  | Other complications following other abortion                                                             |
| Spontaneous Abortion | O0890  | Complication, unspecified, following ectopic pregnancy                                                   |
| Spontaneous Abortion | O0891  | Complication, unspecified, following hydatidiform mole and other abnormal products of conception         |
| Spontaneous Abortion | O0892  | Complication, unspecified, following spontaneous abortion                                                |
| Opioid Related       | F110   | Mental and behavioural disorders due to use of opioids, acute intoxication                               |
| Opioid Related       | F111   | Mental and behavioural disorders due to use of opioids, harmful use                                      |
| Opioid Related       | F112   | Mental and behavioural disorders due to use of opioids, dependence syndrome                              |
| Opioid Related       | F113   | Mental and behavioural disorders due to use of opioids, withdrawal state                                 |
| Opioid Related       | F114   | Mental and behavioural disorders due to use of opioids, withdrawal state with delirium                   |
| Opioid Related       | F115   | Mental and behavioural disorders due to use of opioids, psychotic disorder                               |

## FNED2 Triage Manuscript – Supplementary File

|                |      |                                                                                                      |
|----------------|------|------------------------------------------------------------------------------------------------------|
| Opioid Related | F116 | Mental and behavioural disorders due to use of opioids, amnesic syndrome                             |
| Opioid Related | F117 | Mental and behavioural disorders due to use of opioids, residual and late-onset psychotic disorders  |
| Opioid Related | F118 | Mental and behavioural disorders due to use of opioids, other mental and behavioural disorders       |
| Opioid Related | F119 | Mental and behavioural disorders due to use of opioids, unspecified mental and behavioural disorders |
| Opioid Related | T400 | Poisoning by opium                                                                                   |
| Opioid Related | T401 | Poisoning by heroin                                                                                  |
| Opioid Related | T402 | Poisoning by other opioids                                                                           |
| Opioid Related | T403 | Poisoning by methadone                                                                               |
| Opioid Related | T404 | Poisoning by other synthetic narcotics                                                               |
| Opioid Related | T406 | Poisoning by other and unspecified narcotics                                                         |
